# Supplementary material for: Predictive Value of MUC5AC Signature in Pancreatic Ductal Adenocarcinoma: A Hypothesis Based on Preclinical Evidence
Source: MDPI journal article supplement (doi:10.3390/ijms24098087), 2023-04-30
Supplement: s1 [file s1]

**Supplementary Table S1: Baseline characteristics of pancreatic cell lines**

| Pancreatic cell line | Source                  | Metastasis | Doubling time<br>(in hours) | Differentiation | Protein markers                        |
|----------------------|-------------------------|------------|-----------------------------|-----------------|----------------------------------------|
| MIA PaCa 2 (M) [79]  | Primary Tumor           | Nd         | 40                          | Poor            | No CEA                                 |
| PANC-1 [80]          |                         | Y          | 52                          | Poor            | No CEA                                 |
| BxPC-3[81]           |                         | N          | 48-60                       | Moderate-poor   | CEA, hp-CAA; hp-SA and traces of mucin |
| SU86.86[82]          | Liver metastatic lesion | Y          | 77                          | Moderate-poor   | CEA                                    |
| CAPAN-1[83]          |                         | Y          | 41                          | Well            | Mucin, CEA\LDH and Beta-microglobulin  |
| COLO357 (CO) [84]    | Lymph node              | Y          | 21                          | Well            | Beta-HCG. CEA, mucin-producing         |
| T3M4[85]             |                         | Y          | 31                          | Well            | CEA                                    |
| AsPc-1[86]           | Ascites fluid           | Y          | 38-40                       | Poor            | Abundant mucin and CEA                 |
| SW1990 [87]          | Splenic metastases      | Y          | 36-40                       | Moderate        | CEA, LDH producing                     |

Abbreviations: hp-CAA -human pancreas cancer-associated antigen, hp-SA human pancreas-specific antigen, Y=yes and N=no; CEA – carcinoembryonic antibody; LDH – lactate dehydrogenase

**Supplementary Table S2: Studies used for analyzing the impact of MUC5AC on drug sensitivity**

| mRNA                                     | Protein expression | PC cell line  | Michalski et al. [64]                                    | Fujita et al. [76] | Hofmann et al. [65] |
|------------------------------------------|--------------------|---------------|----------------------------------------------------------|--------------------|---------------------|
| H                                        | H                  | COLO357 (CO.) | ✓                                                        |                    | ✓                   |
| H                                        | H                  | SW1990 (SW)   |                                                          | ✓                  |                     |
| M                                        | M                  | BXCP3 (B)     | ✓                                                        | ✓                  |                     |
| M                                        | L                  | ASPC-1 (A)    | ✓                                                        | ✓                  |                     |
| No                                       | No                 | Mia Pa Ca (M) | ✓                                                        | ✓                  | ✓                   |
| M                                        | No                 | PANC-1 (P)    | ✓                                                        | ✓                  | ✓                   |
| L                                        | No                 | CAPAN-1 (C)   | ✓                                                        | ✓                  |                     |
| H                                        | L                  | T3M4          | ✓                                                        |                    |                     |
| Chemotherapy agents studied in the study |                    |               | 5FU, Gem, OX, Cis, Paclitaxel, Mitomycin, GemOx, Gem/MMC | Gem, 5FU           | Irinotecan          |

H-high; L-low; M-moderate expression; Gem-gemcitabine; Ox-oxaliplatin; MMC-mitomycin; Cis-cisplatin

**Supplemental Figure S1. MUC5AC's mechanism of action in pancreatic ductal adenocarcinoma**

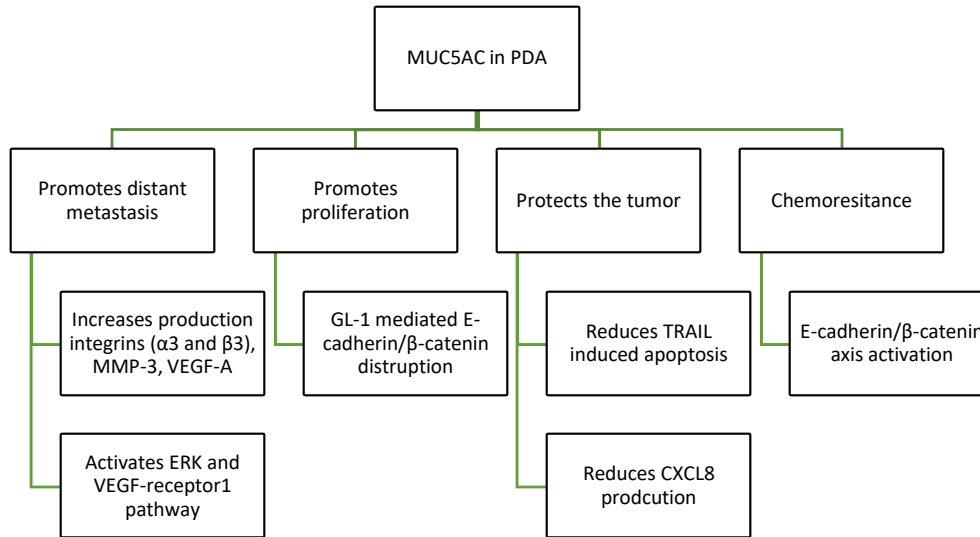

MMP-3, matrix metalloproteinase (MMP) -3; VEGF-A, vascular endothelial growth factor (VEGF) –A; ERK, extracellular-signal-regulated kinase; TRAIL, TNF-related apoptosis-inducing ligand
